# Supplementary material
Source: PubMed Central journal article supplement (PMC2899919)
Supplement: pp.110.157909_1.pdf [file pp.110.157909_1.pdf]

## **Supplemental informations**

### **Endogenous diterpenes derived from *ent*-kaurene, a common gibberellin precursor, regulate protonema differentiation of the moss *Physcomitrella patens***

Ken-ichiro Hayashi, Keisuke Horie, Yuji Hiwatashi, Hiroshi Kawaide, Shinjiro Yamaguchi, Atsushi Hanada, Tamotsu Nakashima, Masatoshi Nakajima, Lewis N. Mander, Hisakazu Yamane, Mitsuyasu Hasebe, Hiroshi Nozaki

Supplemental Figure S1-S7

#### **To whom correspondence**

Ken-ichiro Hayashi, Ph. D.

Department of Biochemistry  
Faculty of Science  
Okayama University of Science  
1-1 Ridai-cho, Okayama 700-0005, Japan  
e-mail: hayashi@dbc.ous.ac.jp  
Telephone: +81-86-256-9661  
Facsimile: +81-86-256-9559

## Supplemental Figure S1

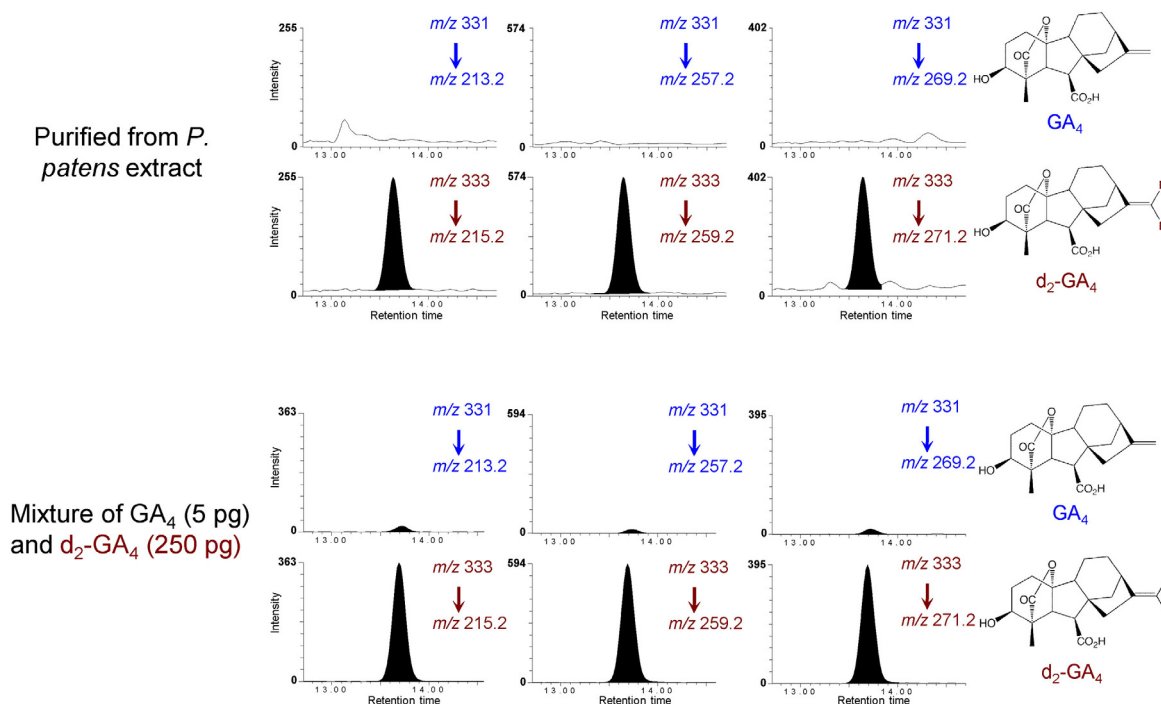

**Figure S1.** LC-MS/MS chromatograms of GA<sub>4</sub> and d<sub>2</sub>-GA<sub>4</sub> in a purified fraction from 3.3 g of *P. patens* tissues (upper panel). Five hundred pg of d<sub>2</sub>-GA<sub>4</sub> were added to the crude extract as an internal standard. Three fragment ions, *m/z* 213.2, 257.2 and 269.2, derived from the molecular ion (*m/z* 331) were monitored for GA<sub>4</sub>. For d<sub>2</sub>-GA<sub>4</sub>, three fragment ions, *m/z* 215.2, 259.2 and 271.2, derived from the molecular ion (*m/z* 333) were detected. The d<sub>2</sub>-GA<sub>4</sub> peaks were clearly detected in the *P. patens* sample, and their signal intensities were equivalent to those of 250 pg of standard d<sub>2</sub>-GA<sub>4</sub> (comparing the *y*-axis scale in the upper and lower panels). In contrast, no fragment ions for the endogenous GA<sub>4</sub> were detected (upper panel). We generated a standard curve by co-injecting 250 pg of d<sub>2</sub>-GA<sub>4</sub> and varying concentrations of cold GA<sub>4</sub>. Five pg of GA<sub>4</sub> were still detectable (lower panel), suggesting that the amount of GA<sub>4</sub> in our *P. patens* sample, if any, was less than 5 pg (less than 1.5 pg/g fresh weight). We analyzed GA<sub>1,8,9,12,15,19,20,24,34,44,51,53</sub> by the same method using the corresponding d<sub>2</sub>-labeled internal standards, and none of them were detected.

Supplemental Figure S2

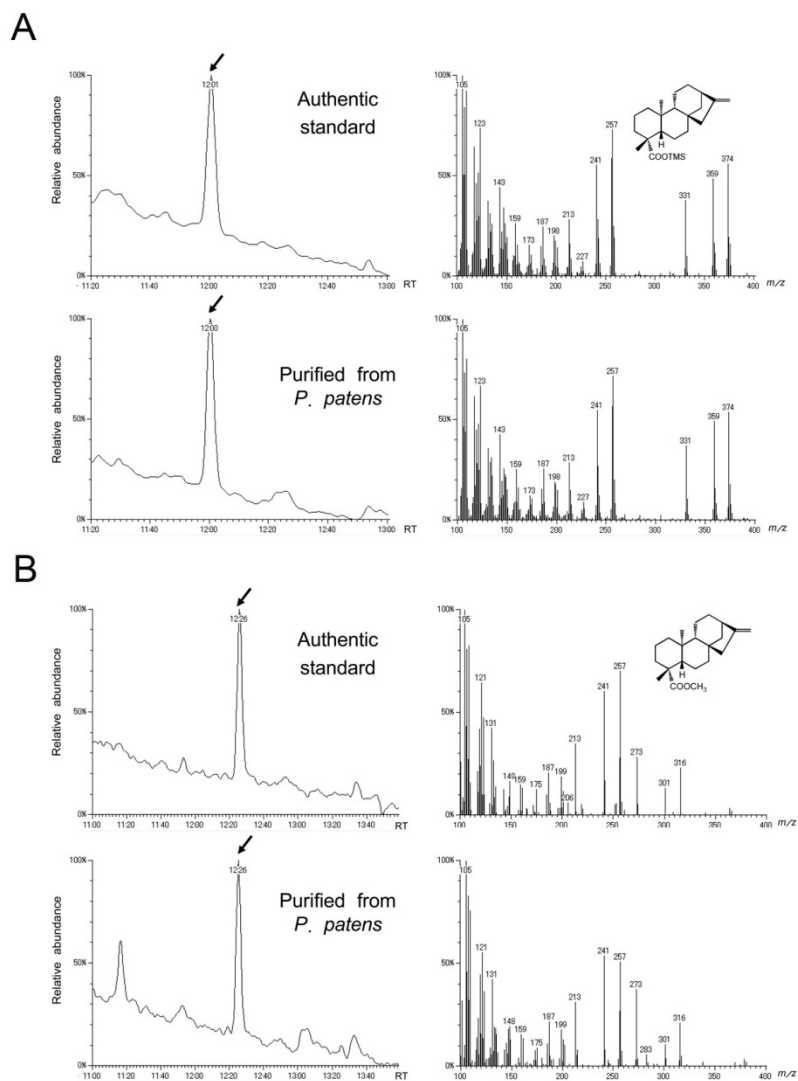

**Figure S2.** Identification of *ent*-kaurenoic acid (*ent*-KA) from *P. patens* as a trimethylsilylester (A) or methylester (B) derivative by GC-MS analysis. Total ion chromatograms (left) and full-scan mass spectra (right) are shown. Arrows indicate the peak for the *ent*-kaurenoic acid derivatives

Supplemental Figure S3

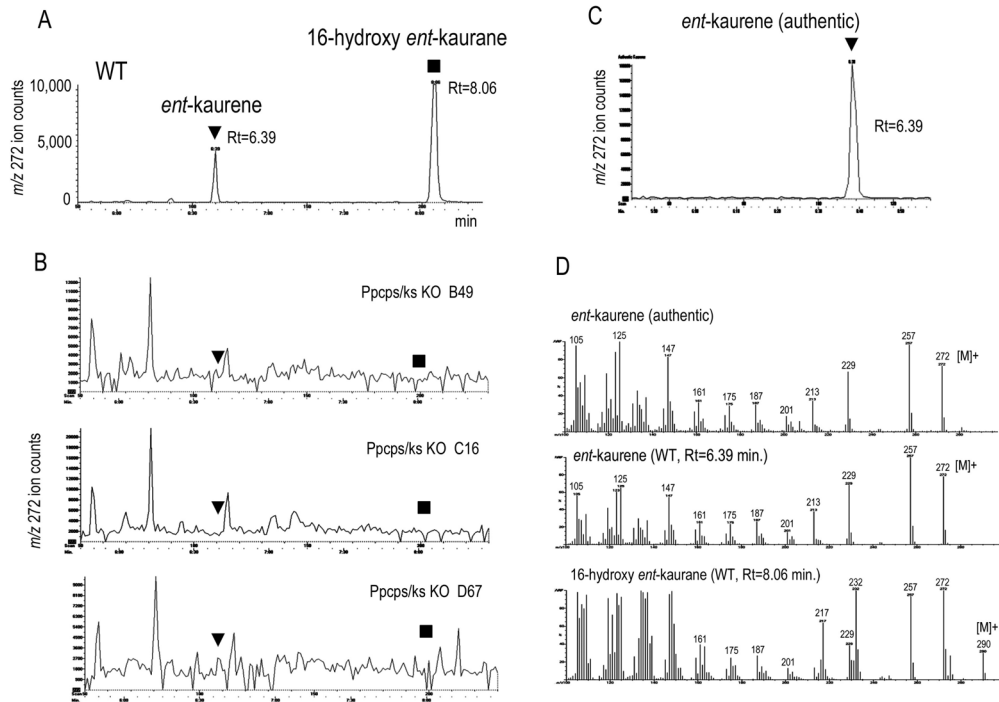

**Figure S3.** GC-MS chromatogram and MS spectra of *ent*-kaurene and 16-hydroxy *ent*-kaurane from wild-type and *Ppcps/ks* KO *P. patens* protonemata. GC-MS analysis of wild-type and *Ppcps/ks* KO lines. The selected ion ( $m/z$  272) in an MS chromatogram of a wild-type extract (A) and *Ppcps/ks* KO B49, C16, and D67 extracts (B) and authentic sample of *ent*-kaurene (C). The triangular and square symbols indicate the peaks of *ent*-kaurene and 16-hydroxy *ent*-kaurane, respectively. D, MS spectra of *ent*-kaurene and 16-hydroxy *ent*-kaurane.

Supplemental Figure S4

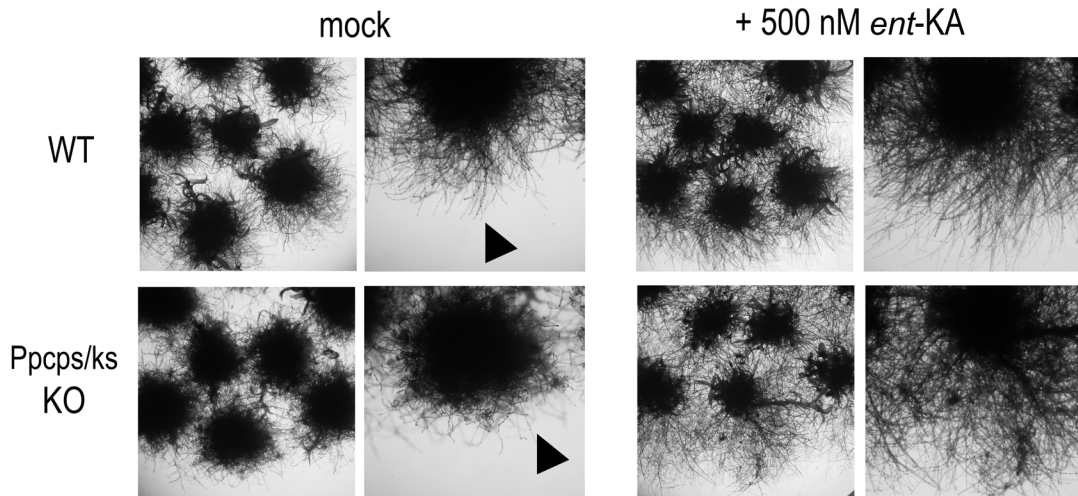

**Figure S4.** Effects of *ent*-kaurenoic acid on the differentiation to caulonemata. The wild-type and *Ppcps/ks* KO A74 line were grown on BCD-ATG medium with or without *ent*-kaurenoic acid for 18 days under red light. Arrow heads represent protruded caulonemata.

Supplemental Figure S5

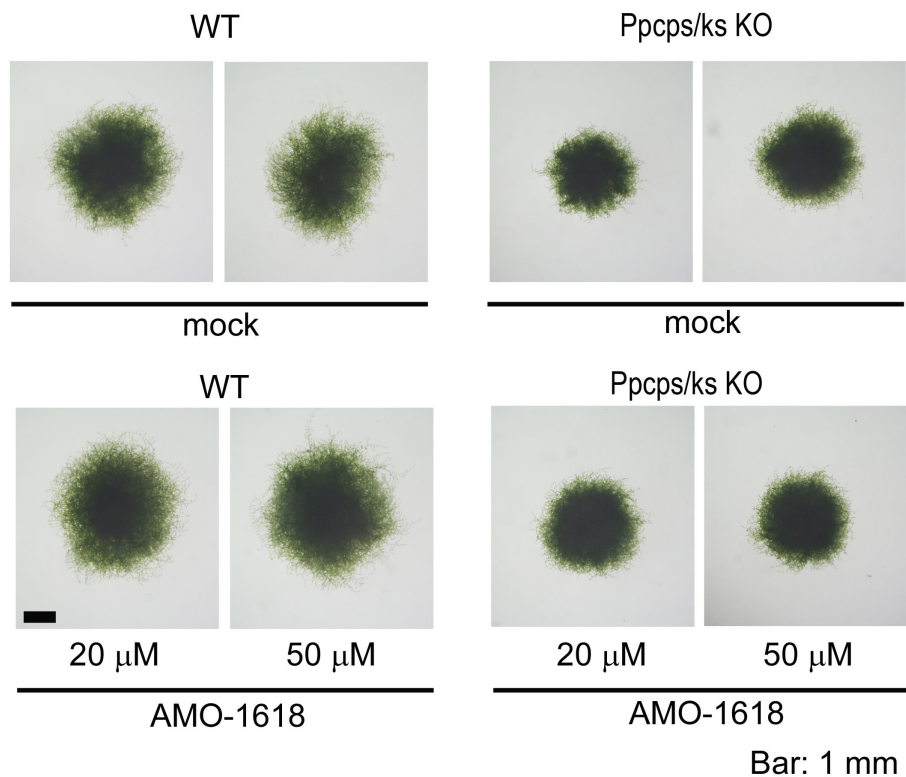

**Figure S5.** Effects of AMO-1618, an inhibitor of the angiosperm enzyme coparyl diphosphate synthase on *P. patens* protonemata. The wild-type (WT) and the Ppcps/ks KO A74 mutant line of *P. patens* were grown on BCD-ATG medium with or without AMO-1618 for 8 days under red light.

## Supplemental Figure S6

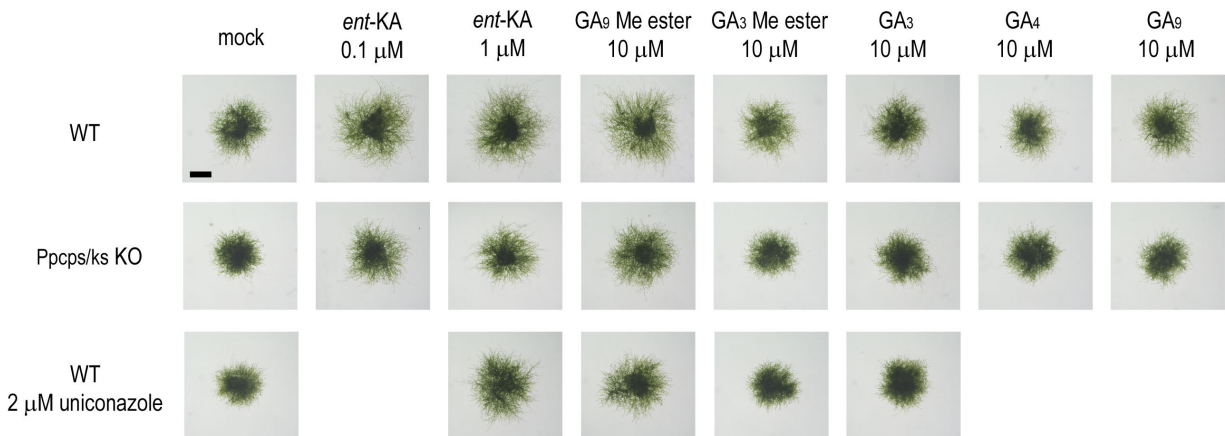

**Figure S6.** Effects of *ent*-kaurenoic acid, GA<sub>9</sub> methyl ester, GA<sub>3</sub> methyl ester, GA<sub>3</sub>, GA<sub>4</sub>, and GA<sub>9</sub> on the differentiation to caulonemata. Protonema of the wild-type and Ppcps/ks KO A74 line were inoculated on BCD-ATG medium supplemented with *ent*-kaurenoic acid (*ent*-KA), GA<sub>9</sub> methyl ester, GA<sub>3</sub> methyl ester, GA<sub>3</sub>, GA<sub>4</sub>, and GA<sub>9</sub> and cultivated under red light for 7 days in the presence or absence of 2  $\mu$ M uniconazole. Scale bar: 1 mm.

Supplemental Figure S7

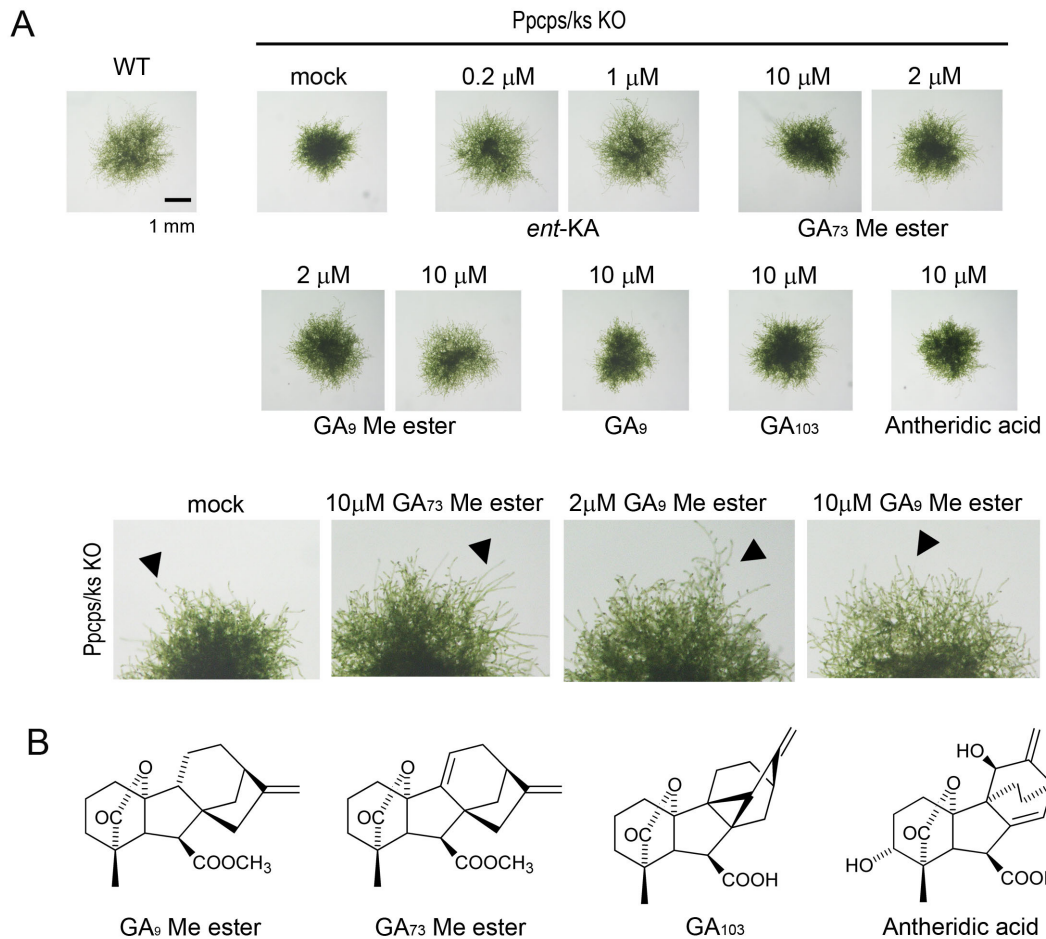

**Figure S7.** Effects of gibberellin-related compounds on the differentiation of chloronemata to caulonemata. A, Effects of GA<sub>73</sub> methyl (Me) ester, GA<sub>103</sub> and antheridic acid on the differentiation to caulonemata. The WT and KO A74 mutant line were cultured on BCD-ATG medium supplemented with *ent*-kaurenoic acid, GA<sub>73</sub> methyl ester, GA<sub>9</sub> methyl ester, GA<sub>9</sub>, GA<sub>103</sub>, and antheridic acid under red light for 7 days. Representative images of protonema colonies after cultivation were shown. The arrows represent the caulonemata. Scale bar: 1 mm. GA<sub>103</sub> and antheridic acid did not restore the defects in caulonemal formation of the KO mutant. On the other hand, GA<sub>73</sub> methyl ester partially recovered the caulonemal formation of the KO mutant, but only weakly. B, Structures of GA<sub>9</sub> methyl ester, GA<sub>73</sub> methyl ester, GA<sub>103</sub>, and antheridic acid, the GA-type antheridiogens of the fern.
